# Supplementary material
Source: PubMed Central journal article supplement (PMC1326181)
Supplement: pnas_0509849103_1.pdf [file pnas_0509849103_1.pdf]

**A**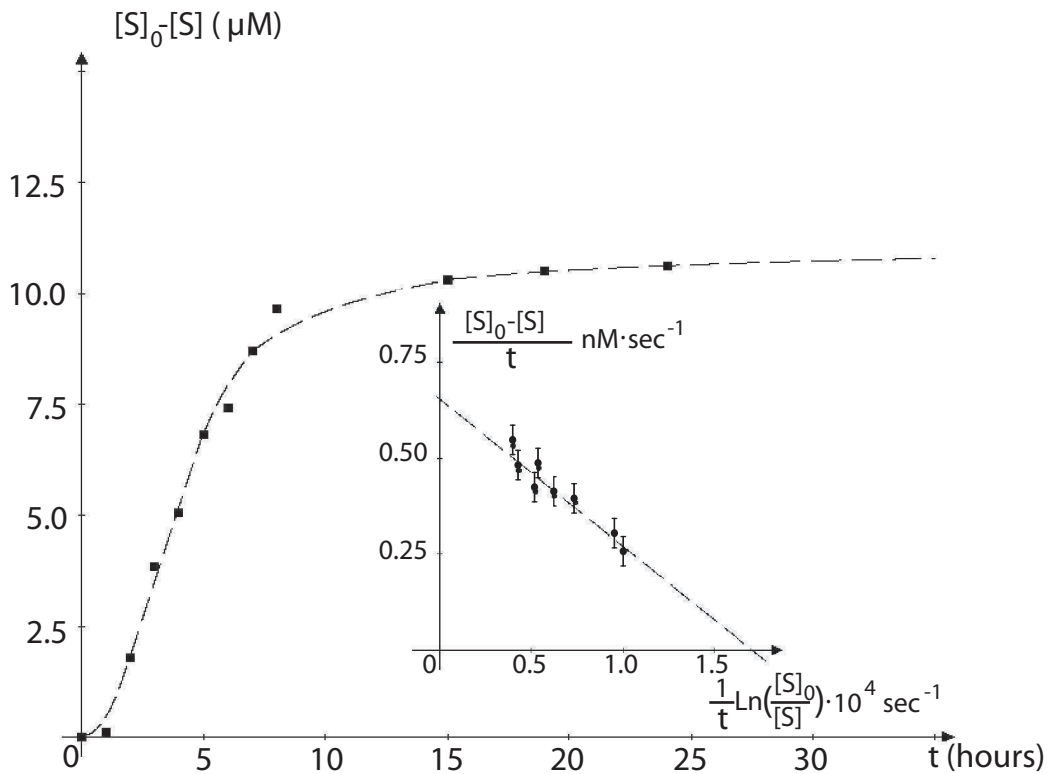**B**

|         |                                        | H-Pro-Phe-Arg-AMC              | MBP                           |
|---------|----------------------------------------|--------------------------------|-------------------------------|
| MS      | $K_m$ (M)                              | $(8.0 \pm 1.3) \cdot 10^{-6}$  | $(7.0 \pm 3.0) \cdot 10^{-6}$ |
|         | $k_{\text{cat}}$ ( $\text{sec}^{-1}$ ) | $(0.6 \pm 0.04) \cdot 10^{-2}$ | $(0.8 \pm 0.2) \cdot 10^{-2}$ |
| EAE SJL | $K_m$ (M)                              | $(4.8 \pm 2.3) \cdot 10^{-6}$  | $(4.0 \pm 1.0) \cdot 10^{-6}$ |
|         | $k_{\text{cat}}$ ( $\text{sec}^{-1}$ ) | $(1.9 \pm 0.2) \cdot 10^{-2}$  | $(1.1 \pm 0.3) \cdot 10^{-2}$ |
