# Supplementary material
Source: PubMed Central journal article supplement (PMC1326181)

# Oxidation activity

|                      |   |                     |                  |                     |   |                     |                     |   |
|----------------------|---|---------------------|------------------|---------------------|---|---------------------|---------------------|---|
| MS IgG mbp+          | + | +                   | +                | +                   | + | -                   | -                   | - |
| Dexamethasone        | - | 10×IC <sub>50</sub> | -                | -                   | - | 10×IC <sub>50</sub> | -                   | - |
| Piroxicam            | - | -                   | IC <sub>50</sub> | 10×IC <sub>50</sub> | - | -                   | 10×IC <sub>50</sub> | - |
| N <sub>2</sub> purge | - | -                   | -                | -                   | + | -                   | -                   | - |

MBP —

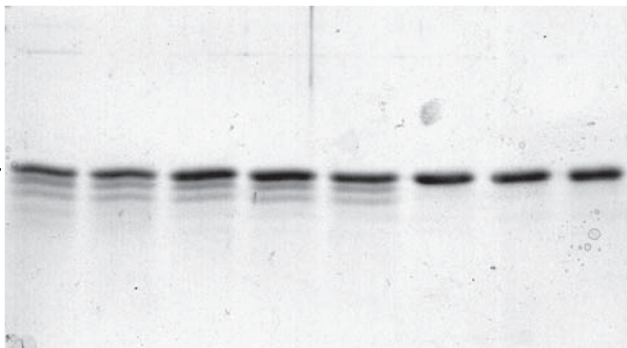

Trx-MBPpeptide 7 —

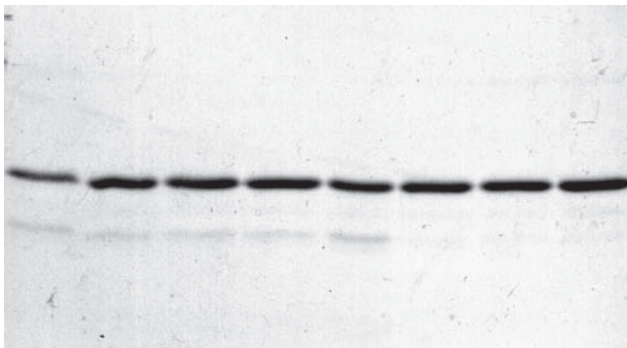

Supplement: pnas_0509849103_4.pdf [file pnas_0509849103_4.pdf]
