# Supplementary material
Source: PubMed Central journal article supplement (PMC1326181)
Supplement: pnas_0509849103_5.pdf [file pnas_0509849103_5.pdf]

Table 2. Inactivation rate and inhibition constants

| Inhibitors  | Constants                                        |
|-------------|--------------------------------------------------|
| AEBSF       | $3.4 \text{ M}^{-1}\text{s}^{-1}$                |
| TPCK        | $2.0 \times 10^{-3} \text{ M}^{-1}\text{s}^{-1}$ |
| TLCK        | $1.2 \times 10^{-3} \text{ M}^{-1}\text{s}^{-1}$ |
| Leupeptin   | $5.0 \times 10^{-5} \text{ M}$                   |
| Antipain    | $3.4 \times 10^{-4} \text{ M}$                   |
| Chymostatin | $3.3 \times 10^{-3} \text{ M}$                   |

Inactivation rate constants and inhibition constants were determined by utilizing PFR-MCA peptide substrate.
