# Supplementary material
Source: PubMed Central journal article supplement (PMC1326181)

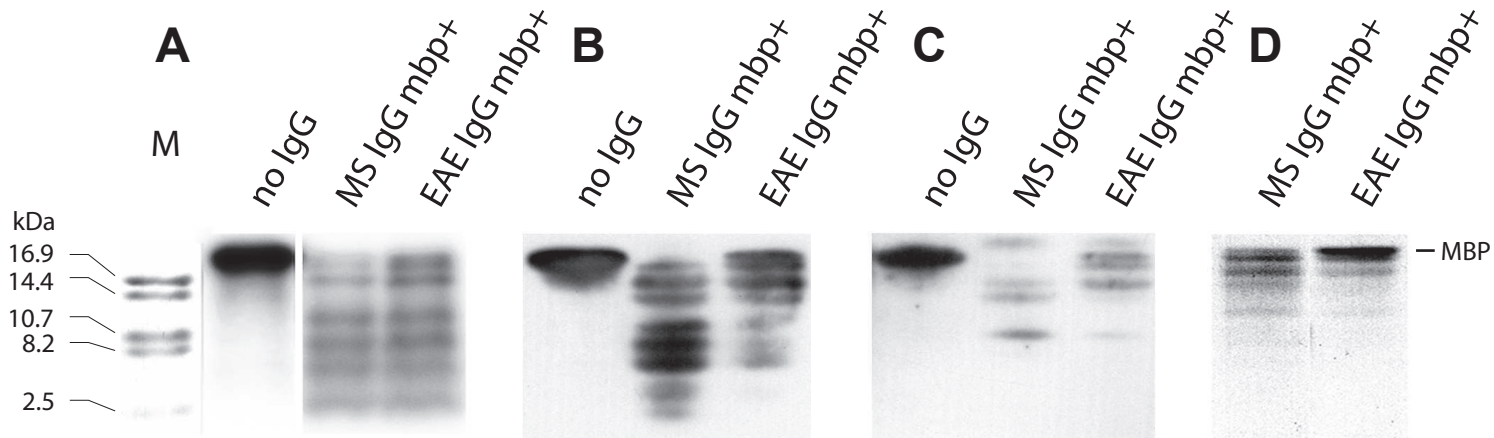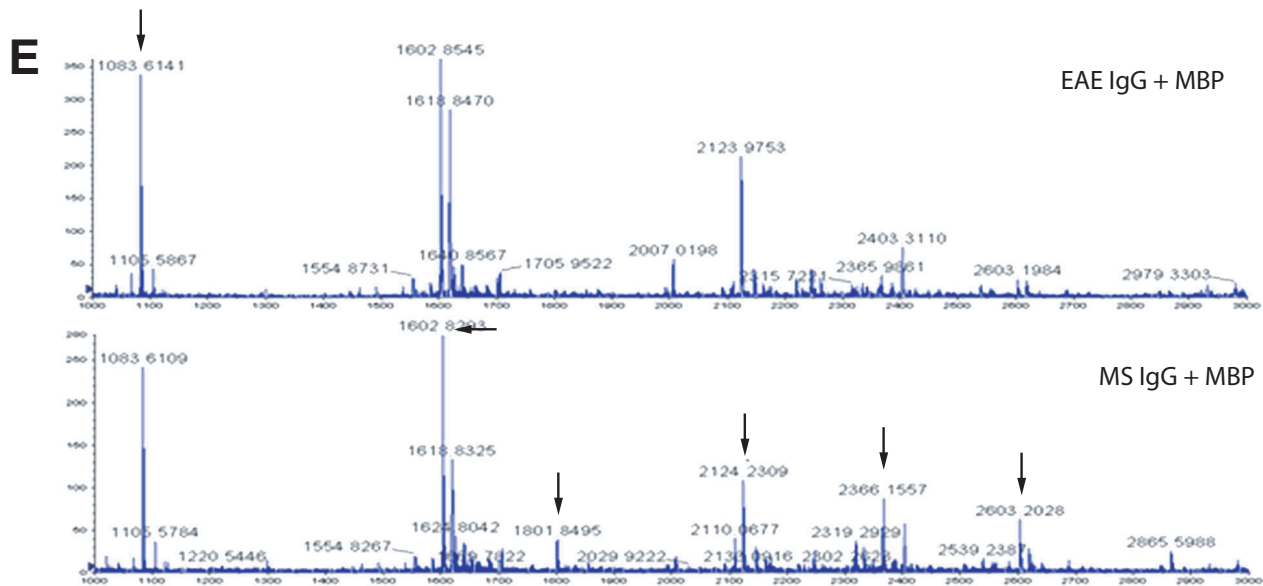

Supplement: pnas_0509849103_2.pdf [file pnas_0509849103_2.pdf]

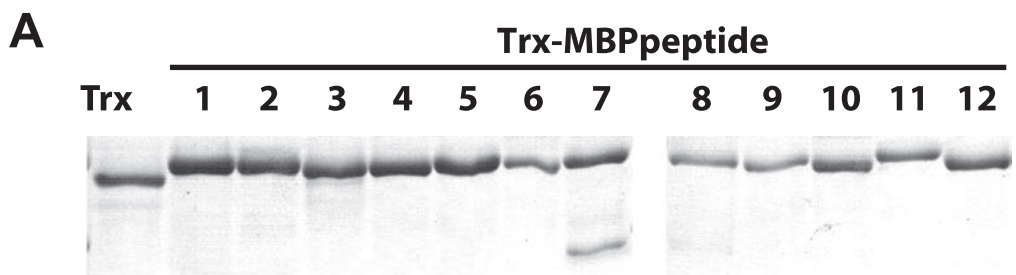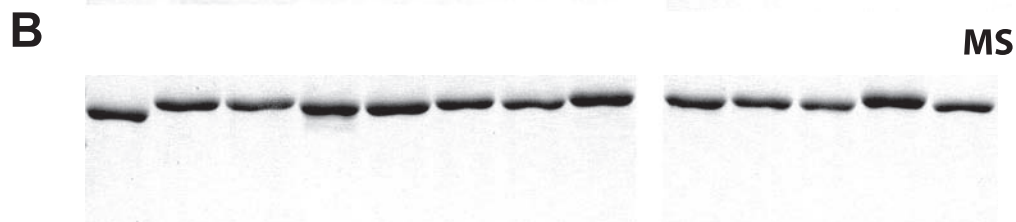

**Control**

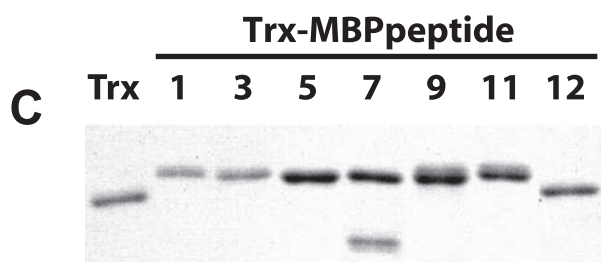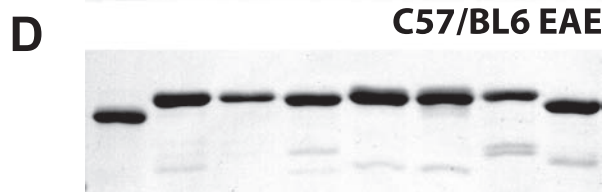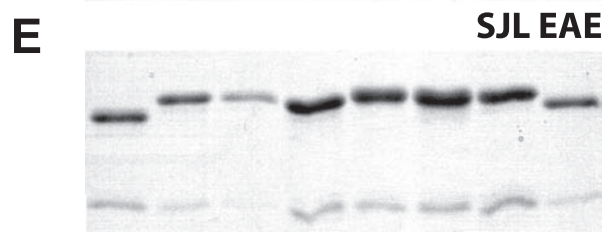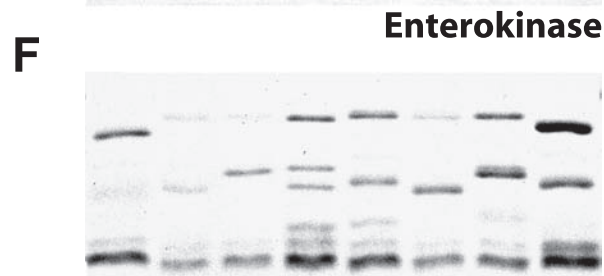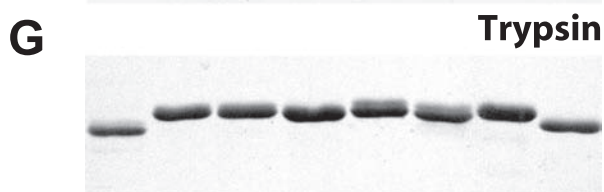

**Control**

Supplement: pnas_0509849103_3.pdf [file pnas_0509849103_3.pdf]
